# Supplementary material
Source: Springer Nature journal article supplement (https://www.springermedizin.de/resource/supplementary/12960_2012_322_MOESM2_ESM.pdf/9569900)

# Annual Supply

# Annual Loss

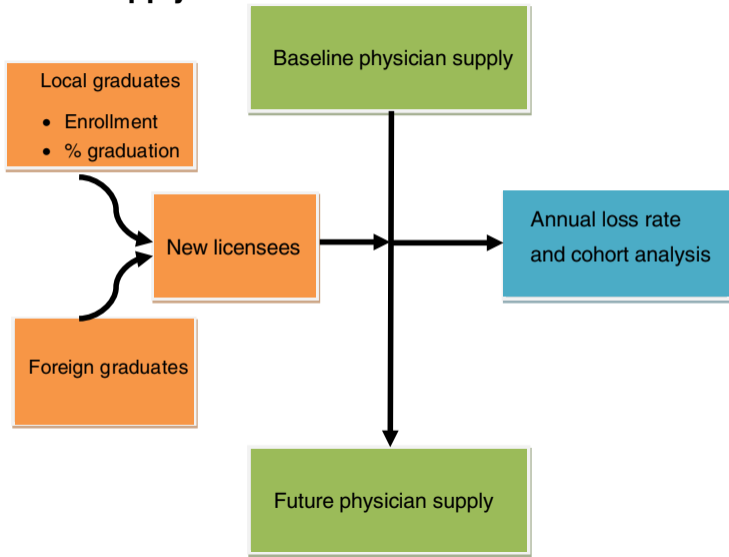

Supplement: MOESM2 [file 9569900]
